# Supplementary material for: A Selective Glutathione Probe based on AIE Fluorogen and its Application in Enzymatic Activity Assay
Source: PubMed Central journal article supplement — Sci Rep. 2014 Mar 7;4:4272. doi: 10.1038/srep04272 (PMC3945925; doi:10.1038/srep04272), 2014-03-07
Supplement: srep04272-s1.pdf [file srep04272-s1.pdf]

# Supporting Information

## **A Selective Glutathione Probe based on AIE Fluorogen and its Application in Enzymatic Activity Assay**

Xiaoding Lou,<sup>1,2,†</sup> Yuning Hong,<sup>2,†</sup> Sijie Chen,<sup>2</sup> Chris Wai Tung Leung,<sup>2</sup> Na Zhao,<sup>2</sup> Bo Situ,<sup>2</sup> Jacky Wing Yip Lam<sup>2</sup> & Ben Zhong Tang<sup>1,2,3\*</sup>

<sup>1</sup> HKUST Shenzhen Research Institute, No. 9 Yuexing 1st RD, South Area, Hi-tech Park, Nanshan, Shenzhen 518057, China. <sup>2</sup> Department of Chemistry, Institute for Advanced Study, Division of Biomedical Engineering, Division of Life Science, State Key Laboratory of Molecular Neuroscience, and Institute of Molecular Functional Materials, The Hong Kong University of Science and Technology (HKUST), Clear Water Bay, Kowloon, Hong Kong, China. <sup>3</sup> Guangdong Innovative Research Team, SCUT-HKUST Joint Research Laboratory, State Key Laboratory of Luminescent Materials and Devices, South China University of Technology, Guangzhou 510640, China. † These authors contribute equally. \* Correspondence and requests for materials should be addressed to B.Z.T. (email: [tangbenz@ust.hk](mailto:tangbenz@ust.hk)).

### **Contents**

|                                                                                                                                                      |    |
|------------------------------------------------------------------------------------------------------------------------------------------------------|----|
| Figure S1. Emission spectra, plot of relative emission intensity and photographs of TPE-DCV in ethanol/water mixtures.                               | S2 |
| Figure S2. Structures of general amino acids.                                                                                                        | S3 |
| Figure S3. Emission spectra of TPE-DCV in the presence of different amino acids.                                                                     | S4 |
| Figure S4. Emission spectra of TPE-DCV in the presence of GSH, Cys and Hcy in ethanol/water mixture with water fraction of 70%.                      | S4 |
| Figure S5. Absorption spectra of TPE-DCV before and after addition of GSH, Cys, or Hcy in a water/ethanol mixture.                                   | S5 |
| Figure S6. <sup>1</sup> H NMR spectra of TPE-DCV and its reaction product in the presence of ME at room temperature in DMSO- <i>d</i> <sub>6</sub> . | S5 |
| Figure S7. Mass spectra of TPE-DCV and TPE-DCV-ME.                                                                                                   | S6 |
| Figure S8. Time-dependent emission spectra of TPE-DCV in the presence of glutathione reductase.                                                      | S7 |
| Figure S9. Time-dependent emission spectra of TPE-DCV in the presence of GSSG.                                                                       | S7 |
|                                                                                                                                                      | S1 |

Figure S10. Time-dependent emission spectra of TPE-DCV with GSSG in the presence of glutathione reductase (1 UN). S8

Figure S11. Time-dependent emission spectra of TPE-DCV with GSSG in the presence of glutathione reductase (3 UN). S8

Figure S12. Time-dependent emission spectra of TPE-DCV with GSSG in the presence of glutathione reductase (5 UN). S9

Figure S13. Cytotoxicity of TPE-DCV on HeLa cells evaluated by MTT assay. S9

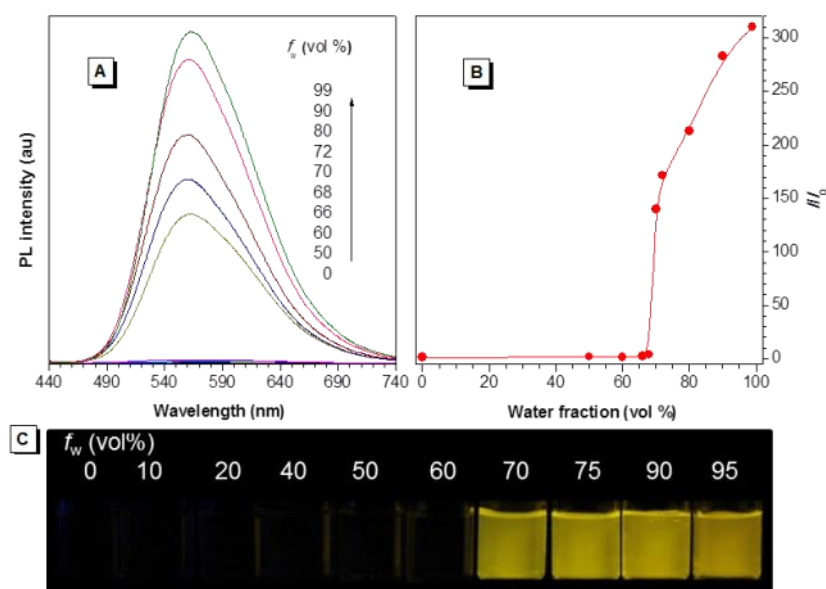

**Figure S1.** (A) Emission spectra of TPE-DCV (3  $\mu$ M) in ethanol/water mixtures with different volume fractions of water ( $f_w$ ). (B) Plot of relative emission intensity ( $I/I_0$ ) at 563 nm versus  $f_w$ .  $I_0$  denotes the intensity of TPE-DCV in pure ethanol. Excitation wavelength: 415 nm. (C) Photographs of TPE-DCV (10  $\mu$ M) in ethanol/water mixtures with different water fractions taken under illumination of UV lamp.

**Figure S2.** Structures of General Amino Acids.

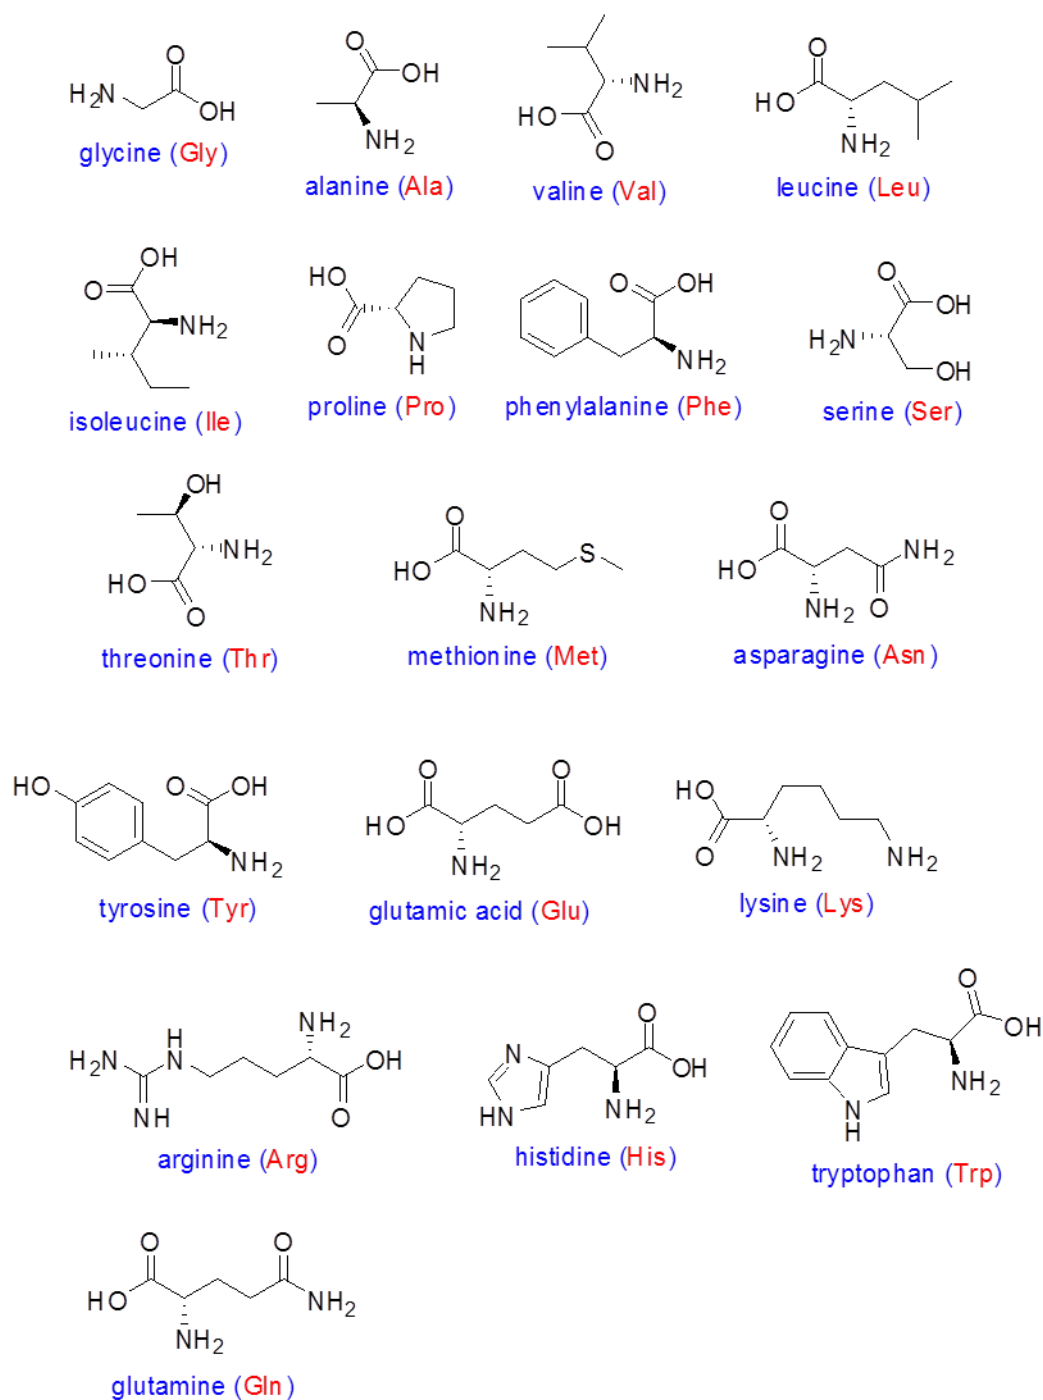

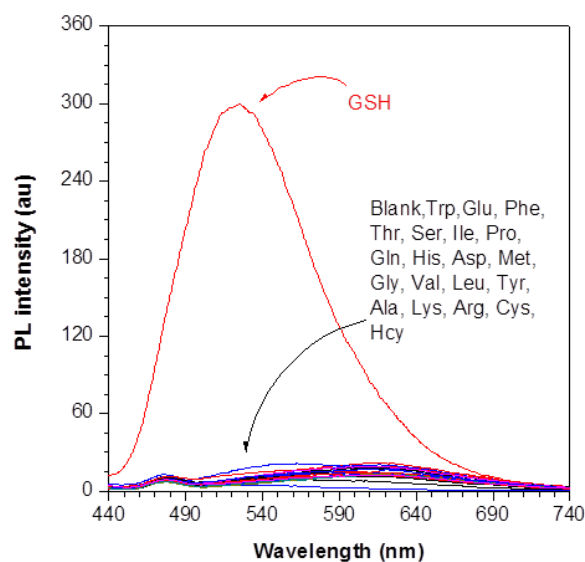

**Figure S3.** Emission spectra of TPE-DCV (3  $\mu$ M) in the presence of different amino acids (1 mM) in ethanol/water mixture with water fraction of 68%. Excitation wavelength: 415 nm.

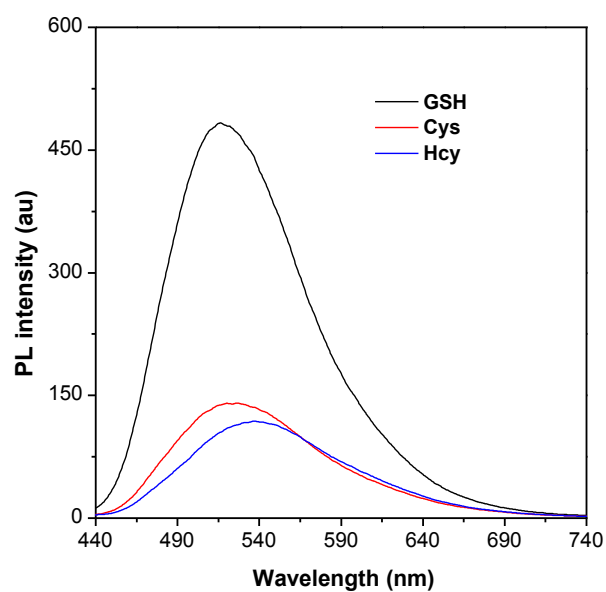

**Figure S4** Emission spectra of TPE-DCV (3  $\mu$ M) in the presence of GSH, Cys and Hcy (1 mM) in ethanol/water mixture with water fraction of 70%. Excitation wavelength: 415 nm.

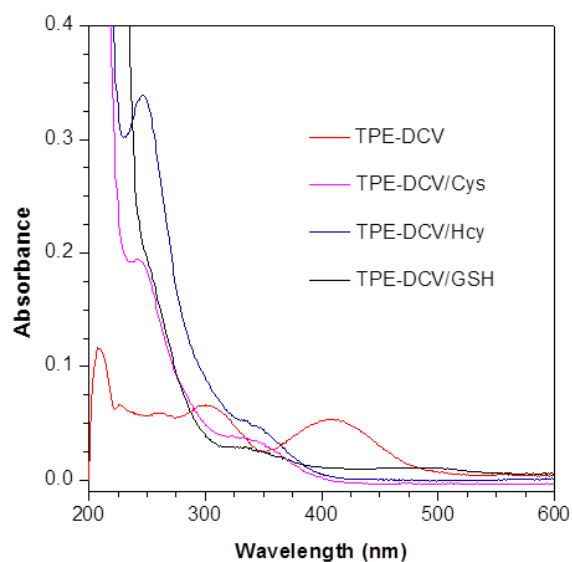

**Figure S5.** Absorption spectra of TPE-DCV (3  $\mu$ M) before and after addition of GSH, Cys, or Hcy (1 mM) in a water/ethanol mixture (68:32, v/v).

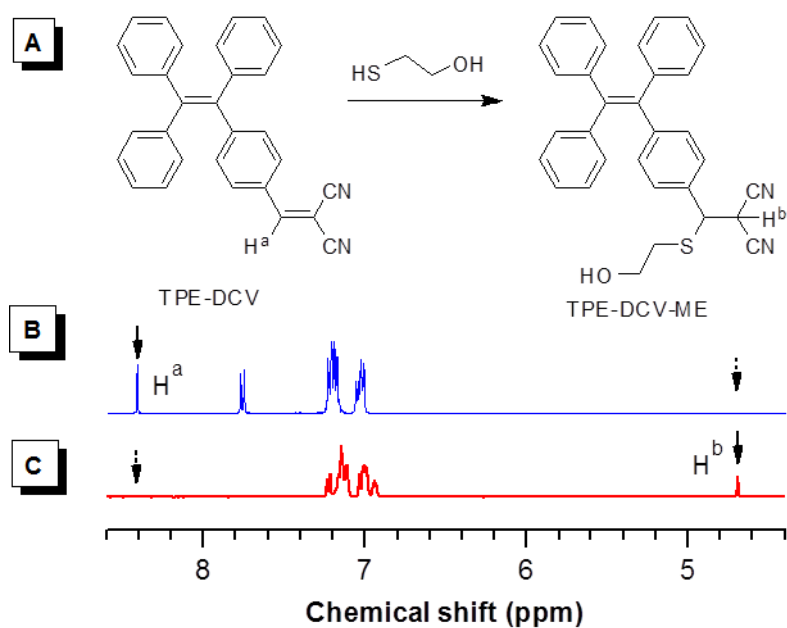

**Figure S6.** (A) Model reaction of TPE-DCV with 2-mercaptoethanol (ME).  $^1\text{H}$  NMR spectra of (B) TPE-DCV (10 mM) and (C) its reaction product in the presence of 8 molar equivalent ME at room temperature in  $\text{DMSO-}d_6$ .

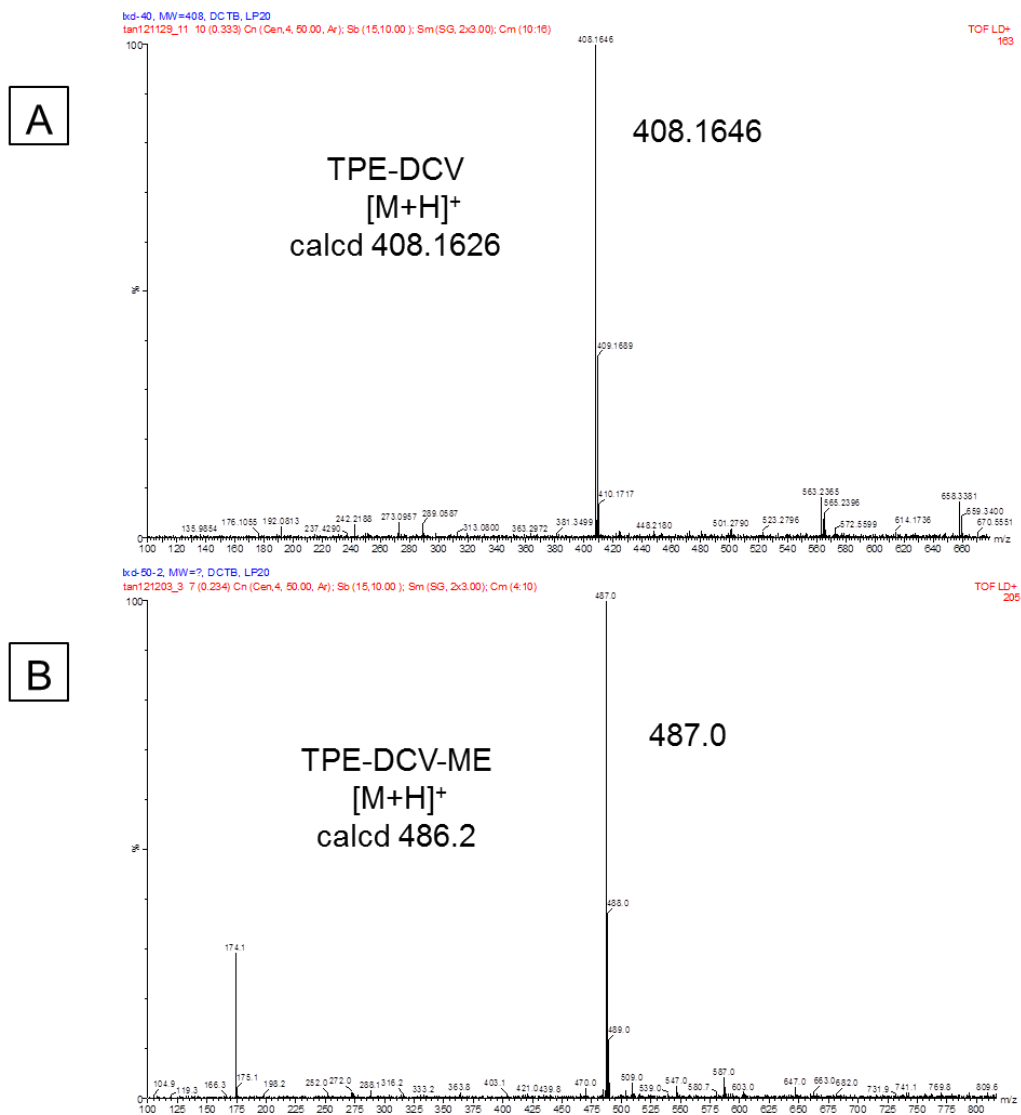

**Figure S7.** Mass spectra of (A) TPE-DCV and (B) TPE-DCV-ME.

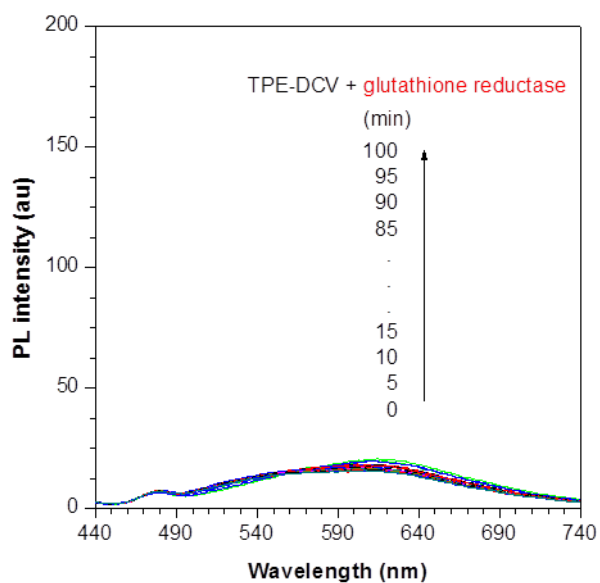

**Figure S8.** Time-dependent emission spectra of TPE-DCV (3  $\mu\text{M}$ ) in the presence of glutathione reductase (10 UN) in a water/ethanol mixture (68:32, v/v). Excitation wavelength: 415 nm.

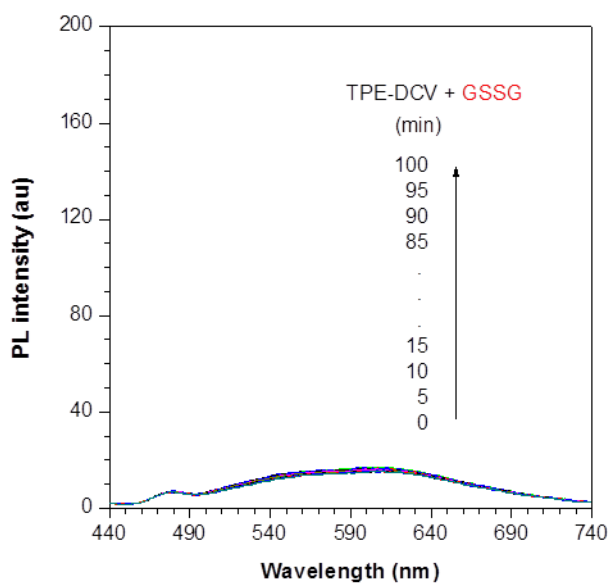

**Figure S9.** Time-dependent emission spectra of TPE-DCV (3  $\mu\text{M}$ ) in the presence of GSSG (1 mM) in a water/ethanol mixture (68:32, v/v). Excitation wavelength: 415 nm.

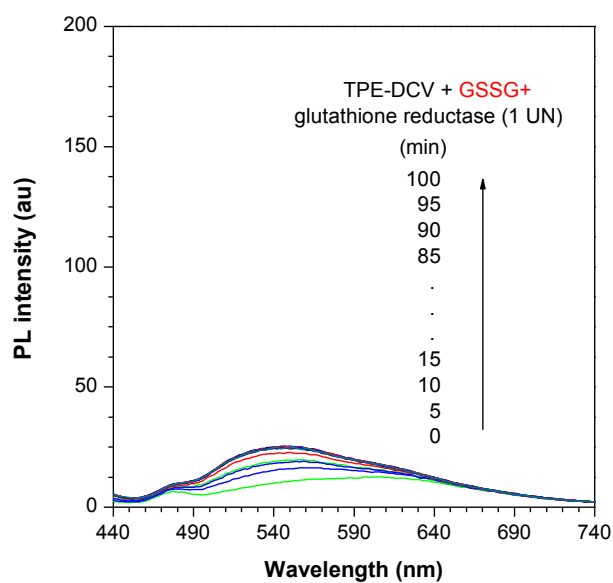

**Figure S10.** Time-dependent emission spectra of TPE-DCV (3  $\mu$ M) in a water/ethanol mixture (68:32, v/v) with GSSG (1 mM) in the presence of glutathione reductase (1 UN). Excitation wavelength: 415 nm.

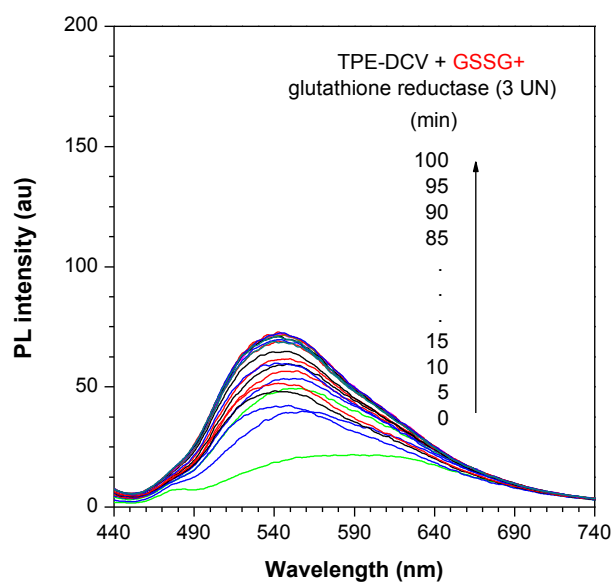

**Figure S11.** Time-dependent emission spectra of TPE-DCV (3  $\mu$ M) in a water/ethanol mixture (68:32, v/v) with GSSG (1 mM) in the presence of glutathione reductase (3 UN). Excitation wavelength: 415 nm.



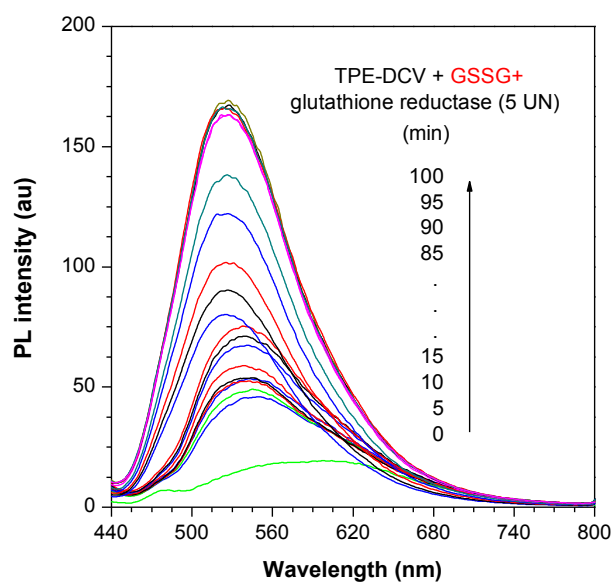

**Figure S12.** Time-dependent emission spectra of TPE-DCV (3  $\mu\text{M}$ ) in a water/ethanol mixture (68:32, v/v) with GSSG (1 mM) in the presence of glutathione reductase (5 UN). Excitation wavelength: 415 nm.

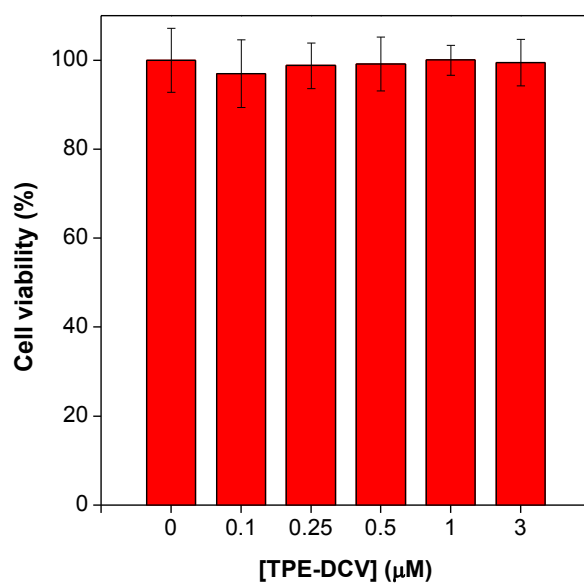

**Figure S13.** Cytotoxicity of TPE-DCV on HeLa cells evaluated by MTT assay.
